# Supplementary material for: Aircrew Health: A Systematic Review of Physical Agents as Occupational Risk Factors
Source: Preprints.org preprint supplement (doi:10.20944/preprints202304.0017.v1), 2023-04-03
Supplement: Supplementary file 1 [file supplementary]

**ANDREW CLIFFORD DAVIS TRADUCAO – ME  
MEDICAL COMMUNICATIONS**

CNPJ: 27.431.616/0001-73  
Av. Jabaquara, 283 Cj 02 – Saúde  
CEP: 04045-000 São Paulo – SP Brazil  
andrewdavis@acdtranslation.com  
Whtasapp: **+55 (11) 99789-5122**

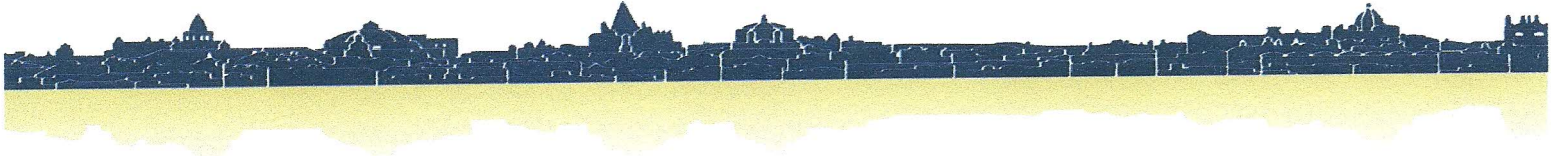

**To whom it may concern:**

**Statement of Review**

This is to certify that the document below has been reviewed and edited by a native speaker of the English language.

**"Aircrew health: a systematic review of physical agents as occupational risk factors"**

*(Authors – Ana Carolina Russo, Elaine Cristina Marqueze, Mariana Souza Gomes Furst, Erika Alvim de Sá e Benevides, Rodrigo Caoduro Roscani, Celso Amorim Salim, Paulo Cesar Vaz Guimarães.*

Date: 15<sup>th</sup> of December, 2022

Andrew Clifford Davis  
Legal Representative  
MEDICAL COMMUNICATIONS - ME  
CNPJ: 27.431.616/0001-73

27.431.616 / 0001 - 73

ANDREW CLIFFORD DAVIS TRADUCAO-ME

Av. Jabaquara, 283 - conjunto 02  
Mirandópolis - CEP: 04045-000  
São Paulo - SP
